# Supplementary material for: Genome-Wide Urea Response in Rice Genotypes Contrasting for Nitrogen Use Efficiency
Source: MDPI journal article supplement (doi:10.3390/ijms24076080), 2023-03-23
Supplement: s1 [file s1]

**Supporting information:**

**Supplementary Tables:**

**Supplementary Table S1:** Nidhi and Panvel1 Urea DEGs

**Supplementary Table S2:** Gene Ontology analysis of Nidhi and Panvel1 DEGs

**Supplementary Table S3:** List of the primers used in this study.

**Supplementary Table S4:** Transporters of genotype Nidhi and Panvel1 encoded by DEGs, their genes, families, functions and references

**Supplementary Table S5:** Functional categorization of Transporters in Nidhi and Panvel1

**Supplementary Table S6:** Transcription Factors of genotype Nidhi and Panvel1 encoded by DEGs, their genes, families, functions and references

**Supplementary Table S7:** Functional categorization of Transcription factors in Nidhi and Panvel1

**Supplementary Table S8:** Conserved motifs in the promoter regions of Nidhi and Panvel1 urea DEGs, their TF family and gene ontology analysis

**Supplementary Table S9:** miRNAs of genotype Nidhi and Panvel1 encoded by DEGs, their target genes, functions and references

**Supplementary Table S10:** Details of protein-protein interaction (PPI) networks and their GO-based functional annotations

**Supplementary Table S11:** Details of urea-responsive PPI molecular complexes in Nidhi and Panvel1.

**Supplementary Table S12:** Details of the DEGs-associated post-translational modifications in Nidhi and Panvel1

**Supplementary Table S13:** DEGs encoding proteins for transporters and TFs

**Supplementary Table S14:** NUE-QTLs (from literature) and Nidhi urea NUE-genes colocalized onto NUE-QTLs

**Supplementary Table S15:** NUE-QTLs (from literature) and Panvel1 urea NUE-genes colocalized onto NUE-QTLs

**Supplementary Table S16:** Urea- and nitrate-responsive common and exclusive genes and associated pathways in Nidhi and Panvel1.

### **Supplementary Figures:**

**Supplementary Figure S1:** Scatter plots show the correlation between the microarray data of Nidhi and Panvell1 grown under low (1.5 mM) and normal (15 mM) urea.

**Supplementary Figure S2:** Heatmap represents the expression pattern of urea regulated differentially expressed top two transporters and transcription factors' families for Nidhi and Panvell1 rice contrasting genotypes.

**Supplementary Figure S3:** DEGs associated protein-protein interaction (PPI) networks developed in Nidhi under low urea condition.

**Supplementary Figure S4:** DEGs associated protein-protein interaction (PPI) networks developed in Panvell1 under low urea condition.

**Supplementary Figure S5:** DEGs associated molecular complexes/subclusters detected in the protein-protein interaction networks developed in Nidhi.

**Supplementary Figure S6:** DEGs associated molecular complexes/subclusters detected in the protein-protein interaction networks developed in Panvell1.
